# Supplementary material
Source: publisher figshare collection journal article supplement (https://karger.figshare.com/ndownloader/files/8714899)
Supplement: Supplementary file 1 [file 8714899]

**Supplementary Table 1 (a, b): Effectiveness of UD monitoring as a screening tool to detect AV access stenosis**

**a)**

|  | **(+) Fistulagram *** | **(-) Fistulagram** | **Totals** |
| --- | --- | --- | --- |
| UD monitoring AV access flow < 600 ml/min or >20% drop from patient’s baseline | 15 (TP) | 3 (FP) | 18 |
| UD monitoring AV access flow > 600 ml/min or within 20% of patient’s baseline | 1 (FN) | 10 (TN) | 11 |
|  | 16 | 13 | 29 |
| * (+) Fistulagram indicates detection of hemodynamically significant stenosis involving at least 50% narrowing. | | | |

| **Sensitivity**  TP/TP+FN=15/16= 93.75% | **Positive Predictive Value**  TP/TP+FP=15/18= 83.3% |
| --- | --- |
| **Specificity**  TN/TN+FP=10/13= 76.9% | **Negative Predictive Value**  TN/TN+FN=10/11= 90.9% |

**b)**

**FIGURE LEGENDS:**

**Supplementary Figure 1:** AV access blood flow as measured by UD monitoring was significantly lower in AV access that experienced at least one thrombotic episode compared to patent AV access

**Supplementary Figure 2:** UD monitoring detected a significant increase in AV access flow following angioplasty in AV accesses with hemodynamically significant stenosis.

Supplementary Figure 1:

Supplementary Figure 2:
